# Supplementary material
Source: PubMed Central journal article supplement (PMC8500922)
Supplement: NIHMS1702939-supplement-1.pdf [file NIHMS1702939-supplement-1.pdf]

## **Supplementary information**

# **Molecular mechanism of N-terminal acetylation by the ternary NatC complex**

Sunbin Deng, Leah Gottlieb, Buyan Pan, Julianna Supplee, Xuepeng Wei, E James Petersson, Ronen Marmorstein

| <b>Supplementary Table 1. Sequence of primers for preparing mutations, Related to STAR Methods section SpNatC Complex Expression and Purification</b> |                                                                                                          |
|-------------------------------------------------------------------------------------------------------------------------------------------------------|----------------------------------------------------------------------------------------------------------|
| SpNaa30- E25A                                                                                                                                         | <b>Forward:</b> <i>GATTTGAGTGCGCCATATAG</i><br><b>Reverse:</b> <i>CTATATGGCGCACTCAAATC</i>               |
| SpNaa30- Y27A                                                                                                                                         | <b>Forward:</b> <i>GAGTGAGCCAGCTAGTAAATATGTG</i><br><b>Reverse:</b> <i>CACATATTTACTAGCTGGCTCACTC</i>     |
| SpNaa30-S24A                                                                                                                                          | <b>Forward:</b> <i>CAAAAAGATTTGGCTGAGCCATATAG</i><br><b>Reverse:</b> <i>CTATATGGCTCAGCCAAATCTTTTTG</i>   |
| SpNaa30-Y71A                                                                                                                                          | <b>Forward:</b> <i>CGCTTAGAGGTGCTATAGCAATGCTGG</i><br><b>Reverse:</b> <i>CCAGCATTGCTATAGCACCTCTAAGCG</i> |
| SpNaa30-Y71F                                                                                                                                          | <b>Forward:</b> <i>CGCTTAGAGGTTTTATAGCAATGCTGG</i><br><b>Reverse:</b> <i>CCAGCATTGCTATAAAACCTCTAAGCG</i> |
| SpNaa30-M74A                                                                                                                                          | <b>Forward:</b> <i>GAGGTTATATAGCAGCGCTGGCCATAG</i><br><b>Reverse:</b> <i>CTATGGCCAGCGCTGCTATATAACCTC</i> |
| SpNaa30-E109A                                                                                                                                         | <b>Forward:</b> <i>GGAAATTGTTTTGGCAACAGAGGTGG</i><br><b>Reverse:</b> <i>CCACCTCTGTTGCCAAAACAATTTCC</i>   |
| SpNaa30-E109Q                                                                                                                                         | <b>Forward:</b> <i>GGAAATTGTTTTGCAAACAGAGGTGG</i><br><b>Reverse:</b> <i>CCACCTCTGTTTGCAAACAATTTCC</i>    |
| SpNaa30-N114A                                                                                                                                         | <b>Forward:</b> <i>CAGAGGTGGATGCTGAGGCAGCCATG</i><br><b>Reverse:</b> <i>CATGGCTGCCTCAGCATCCACCTCTG</i>   |
| SpNaa30-Y121F                                                                                                                                         | <b>Forward:</b> <i>GCCATGTCTTTTTTTGAAAGACTCGGG</i><br><b>Reverse:</b> <i>CCCGAGTCTTTCAAAAAAGACATGGC</i>  |
| SpNaa30-Y121A                                                                                                                                         | <b>Forward:</b> <i>GCCATGTCTTTTGCTGAAAGACTCGGG</i><br><b>Reverse:</b> <i>CCCGAGTCTTTCAGCAAAGACATGGC</i>  |
| SpNaa30-Y135A                                                                                                                                         | <b>Forward:</b> <i>CGTCTTTATCGTGCTTATTTGAACGGC</i><br><b>Reverse:</b> <i>GCCGTTCAAATAAGCACGATAAAGACG</i> |
| SpNaa30-Y136A                                                                                                                                         | <b>Forward:</b> <i>CTTTATCGTTATGCTTTGAACGGCAC</i><br><b>Reverse:</b> <i>GTGCCGTTCAAAGCATAACGATAAAG</i>   |

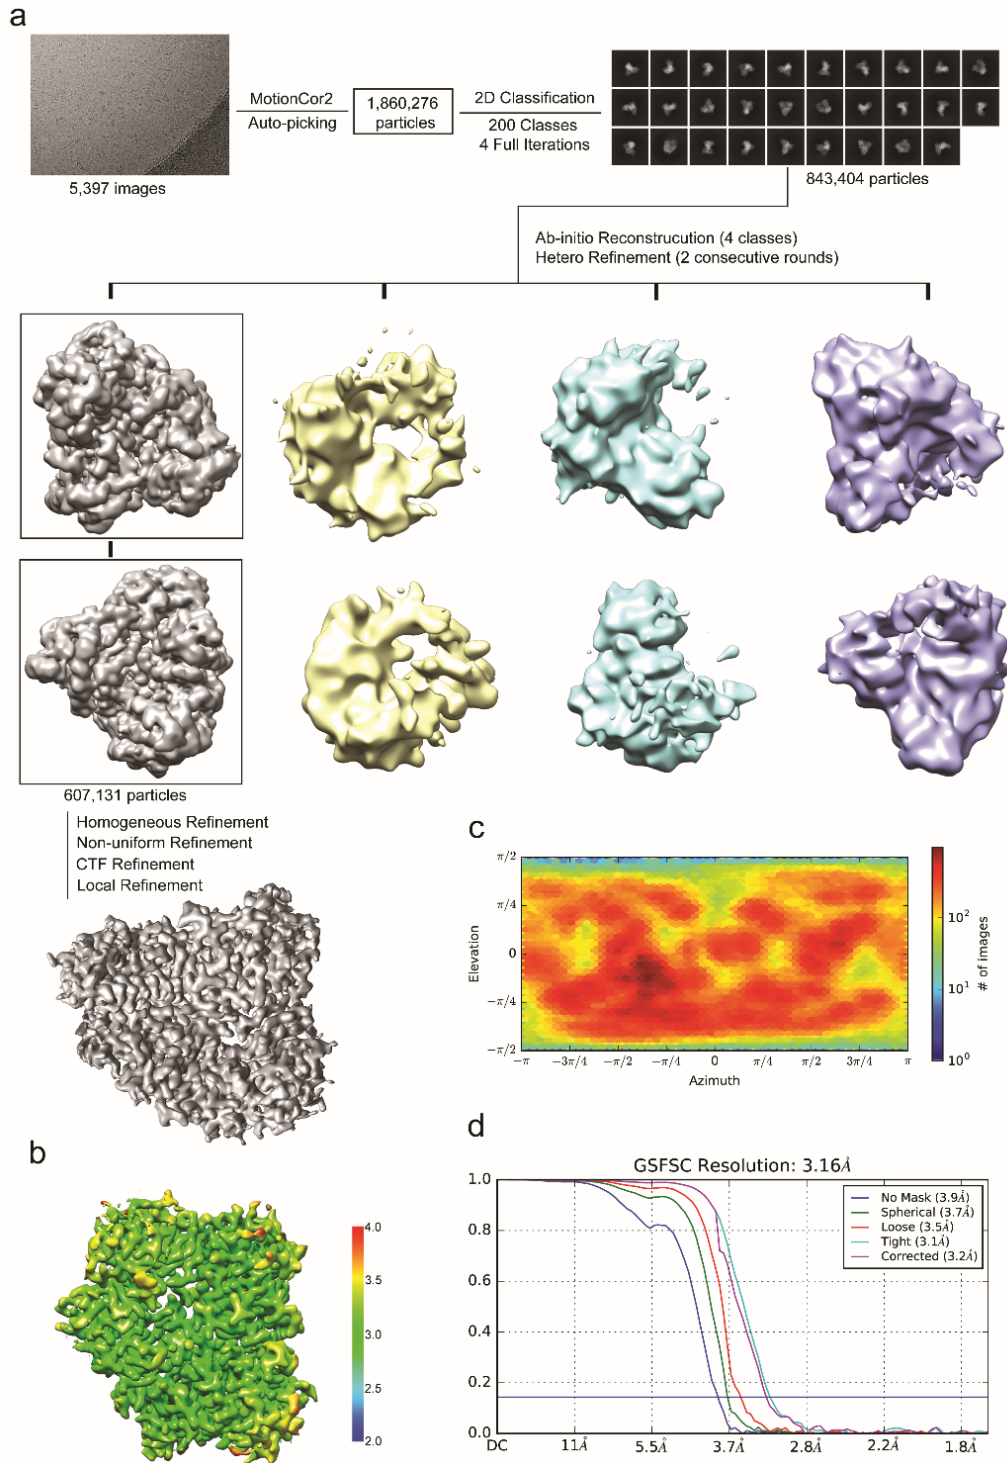

**Supplementary figure 1. Cryo-EM workflow and resolution of *SpNatC* EM map, Related to Figure 2.**

(a) 2D and 3D classification scheme and workflow for *SpNatC* EM map determination. (b) Local resolution of the final *SpNatC* EM map. (c) Viewing direction distribution of *SpNatC* final EM map 3D reconstruction generated by cryoSPARC v2. (d) Gold standard Fourier Shell Correlation (FSC) curves of *SpNatC* EM map 3D reconstruction, generated by cryoSPARC v2.

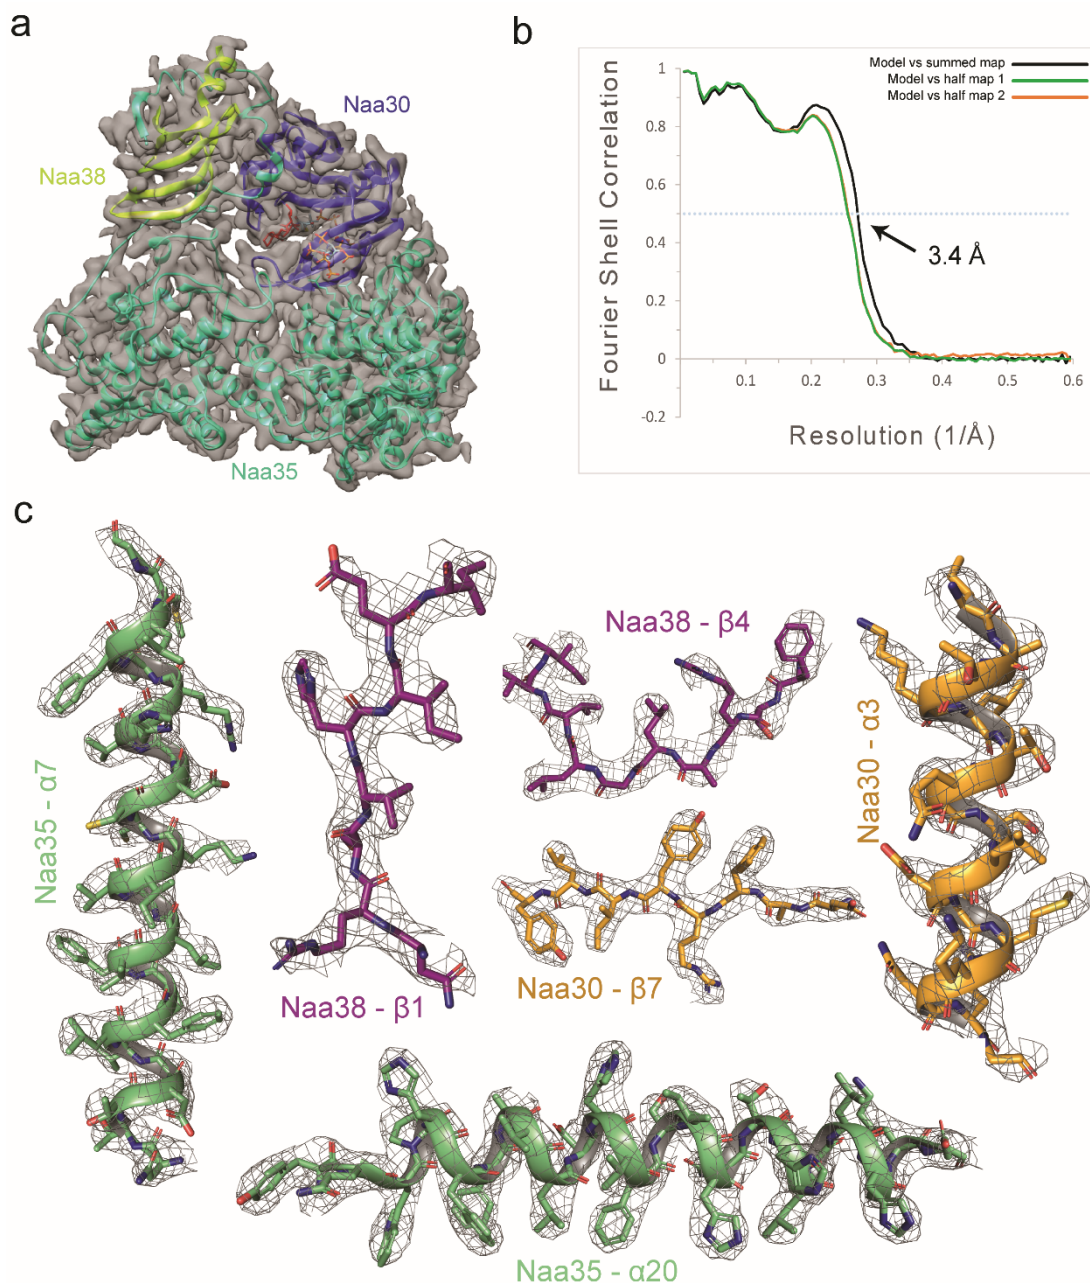

**Supplementary figure 2. Correlation between Cryo-EM map of *SpNatC* EM and its atomic model, Related to Figure 2.**

(a) Atomic model of *SpNatC* fitted into the Cryo-EM map.

(b) FSC curves of the refined model versus the overall map that it was refined against (black); of the model refined in the first of the two independent maps used for the gold-standard FSC versus the same map (green); and of the model refined in the first of the two independent maps versus the second independent map (orange).

(c) The fit of several helical segments or  $\beta$ -strands from all three subunits of NatC in the EM density. The contour level is 5 sigma.

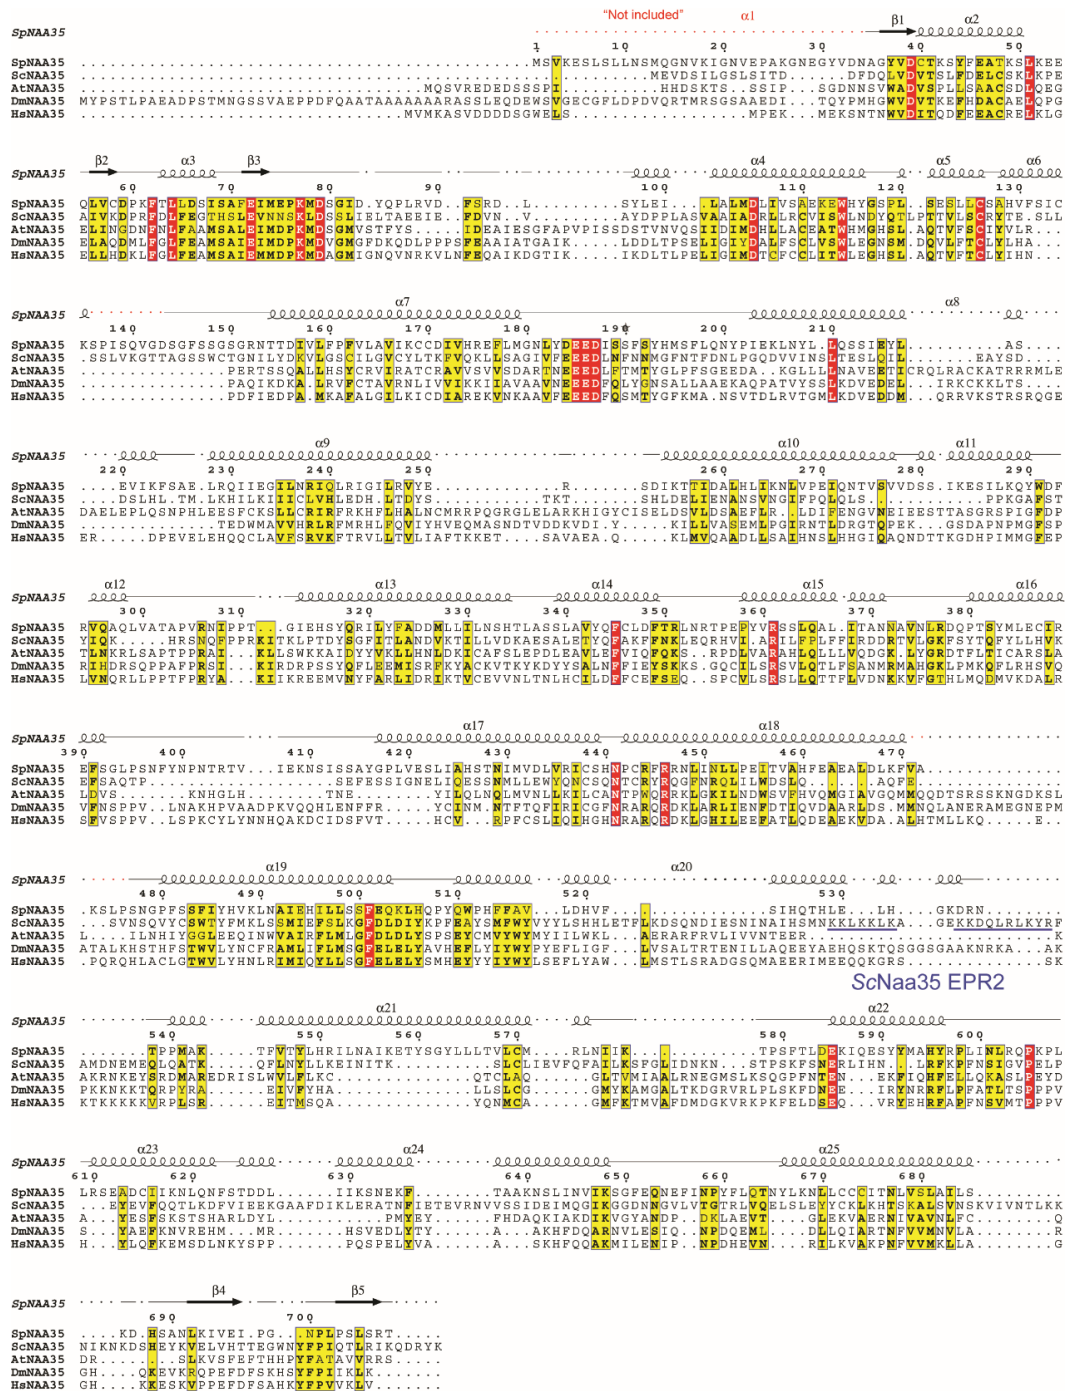

**Supplementary figure 3. Sequence alignment of Naa35 orthologs, Related to Figure 2.** Sequences are from *Schizosaccharomyces pombe* (Sp), *Saccharomyces cerevisiae* (Sc), *Arabidopsis thaliana* (At), *Drosophila melanogaster* (Dm), and *Homo sapiens* (Hs). Numbering and secondary structure elements for SpNaa30 are indicated above the sequence alignment. Residues truncated from the SpNaa35 protein construct used in this study are indicated above in red (“Not included”). EPR2 (Figure 5a) from ScNaa35 is annotated in blue.

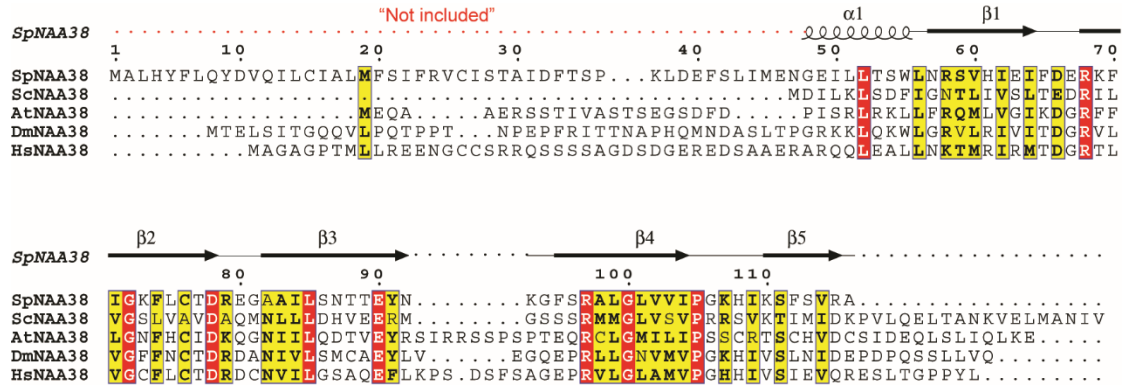

**Supplementary figure 4. Sequence alignment of Naa38 orthologs, Related to Figure 2.** Sequences are from *Schizosaccharomyces pombe* (Sp), *Saccharomyces cerevisiae* (Sc), *Arabidopsis thaliana* (At), *Drosophila melanogaster* (Dm), and *Homo sapiens* (Hs). Numbering and secondary structure elements for SpNaa38 are indicated above the sequence alignment. Residues truncated from the SpNaa38 protein construct used in this study are indicated above in red ("Not included").

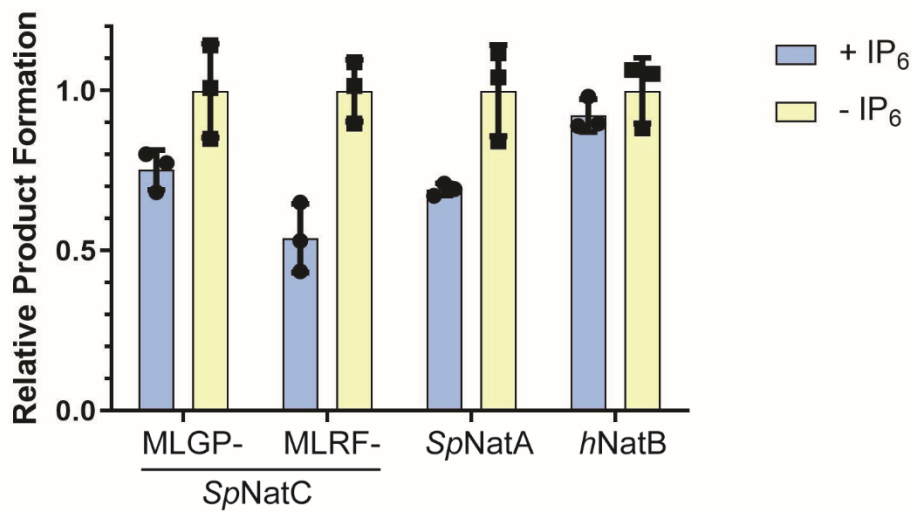

**Supplementary figure 5. The activity impacts of IP<sub>6</sub> on selective NATs, Related to Figure 2.** 50 nM of either SpNatC, SpNatA, and hNatB was mixed with 2 μM or no IP<sub>6</sub> for measuring product formation. Data was normalized to NATs activity without IP<sub>6</sub>. Error bars indicates Mean with SD, n=3.

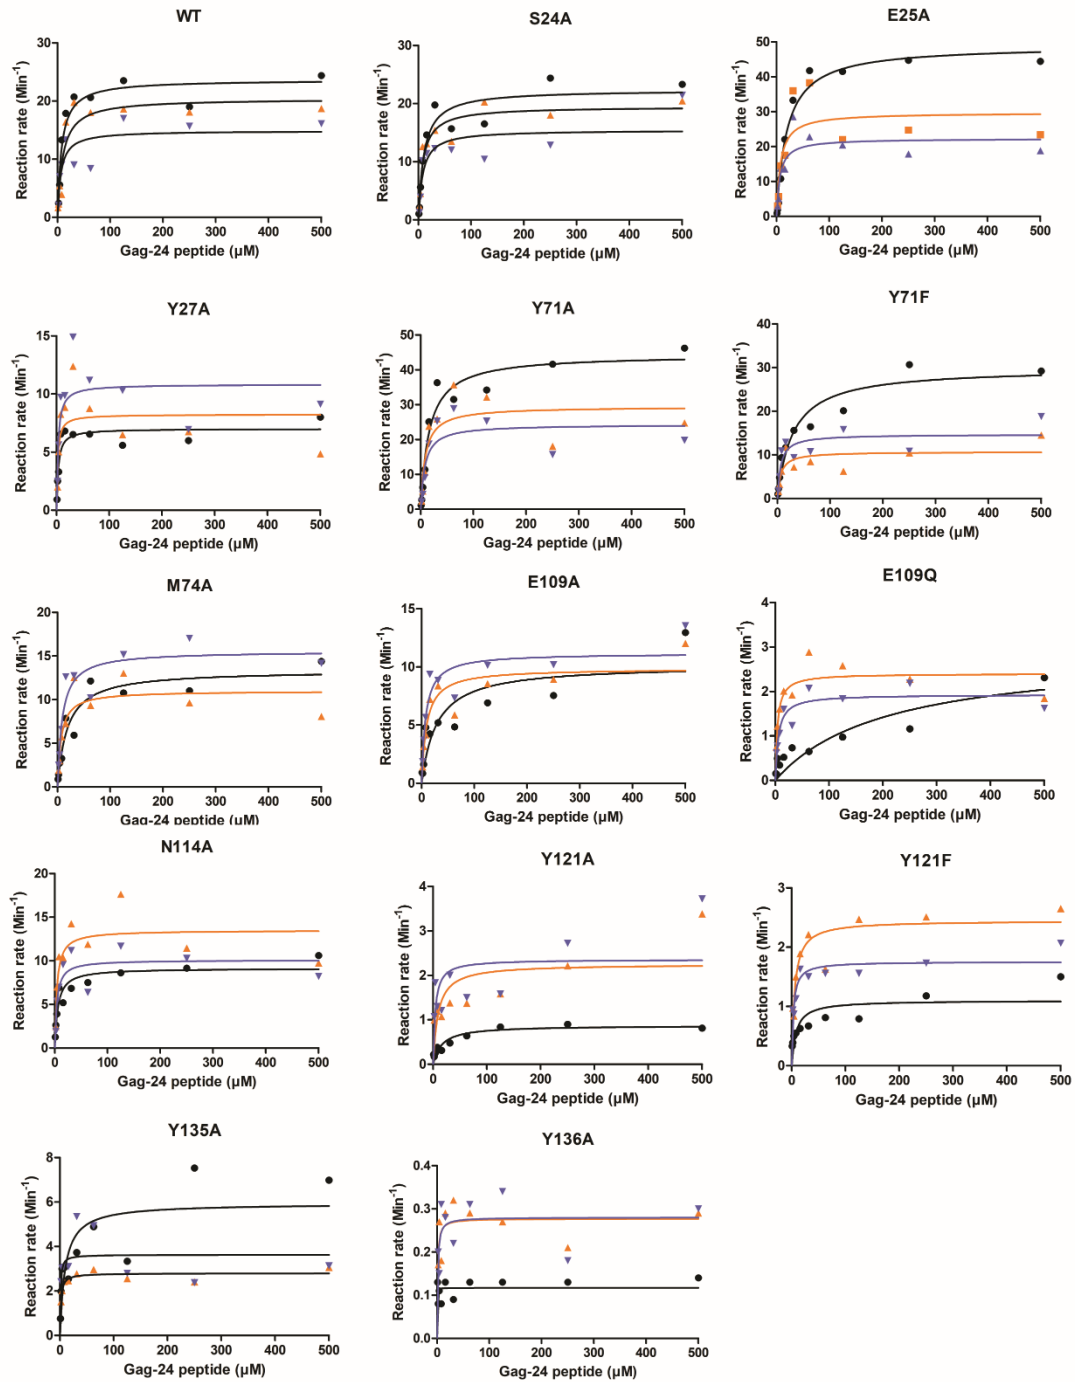

**Supplementary figure 6. Michaelis–Menten kinetic curves of WT and mutant *SpNatC* complexes, Related to Table 2. The data is summarized in Table 2.**



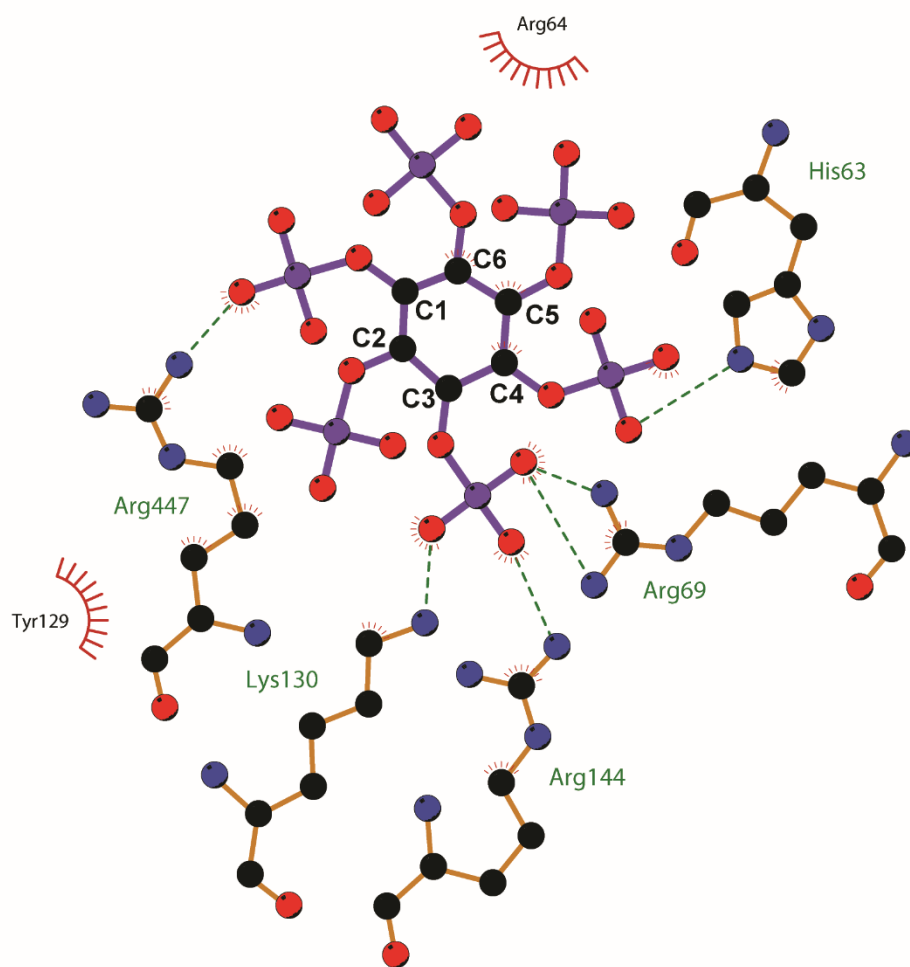

**Supplementary figure 7. Interaction between IP<sub>6</sub> and SpNatC, Related to Figure 2.** Residues that mediate IP<sub>6</sub> hydrogen bonds and van der Waals interaction are shown. The figure was generated with LIGPLOT(Laskowski R A, Swindells M B (2011)).
